# Supplementary material
Source: PubMed Central journal article supplement (PMC8027891)
Supplement: 41396_2020_787_MOESM4_ESM.pdf [file 41396_2020_787_MOESM4_ESM.pdf]

**A****Citrate**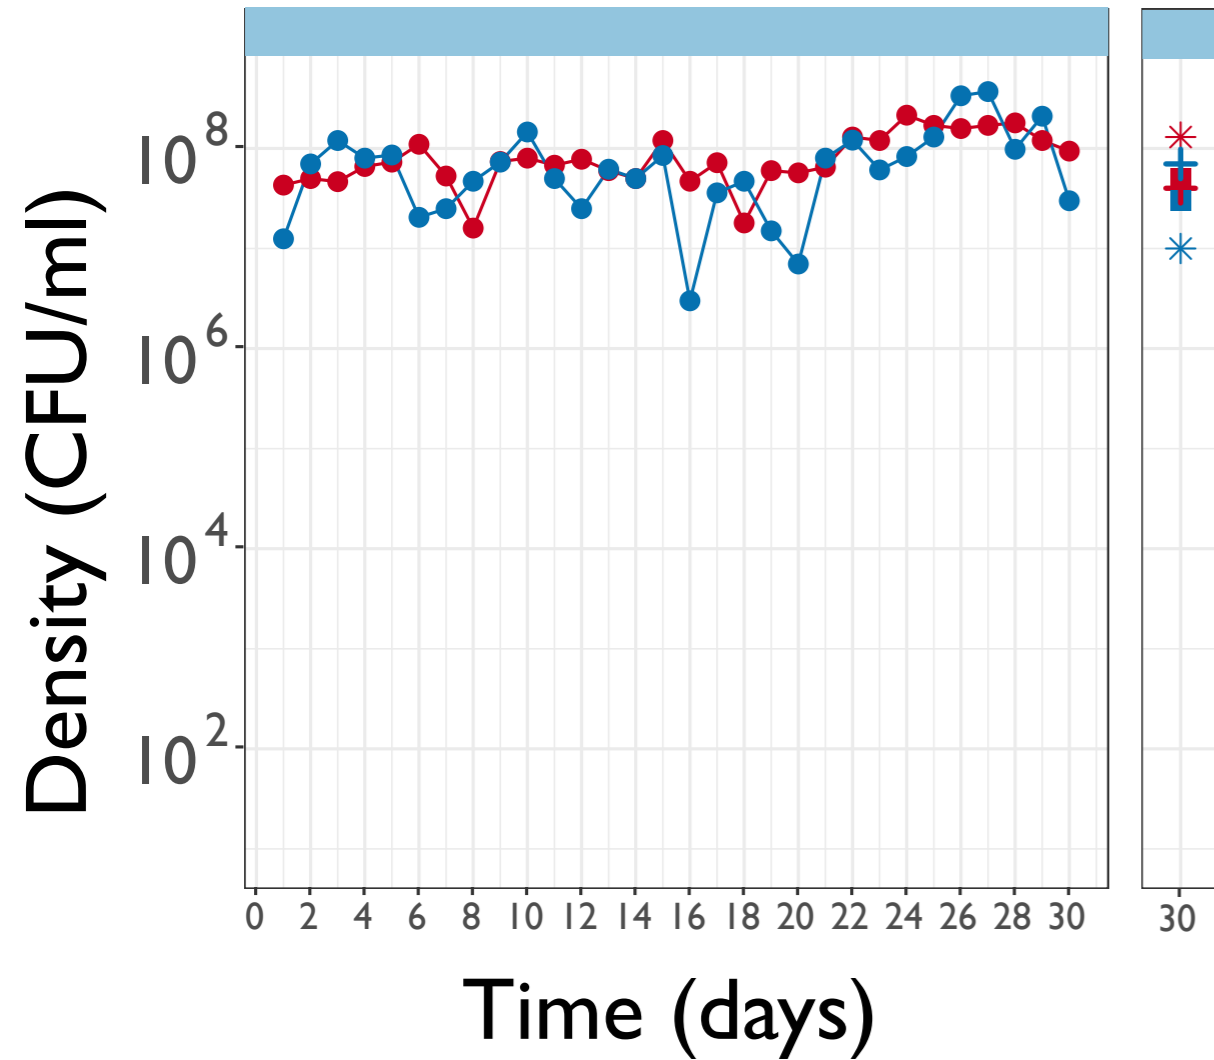**B****Benzyl Alcohol**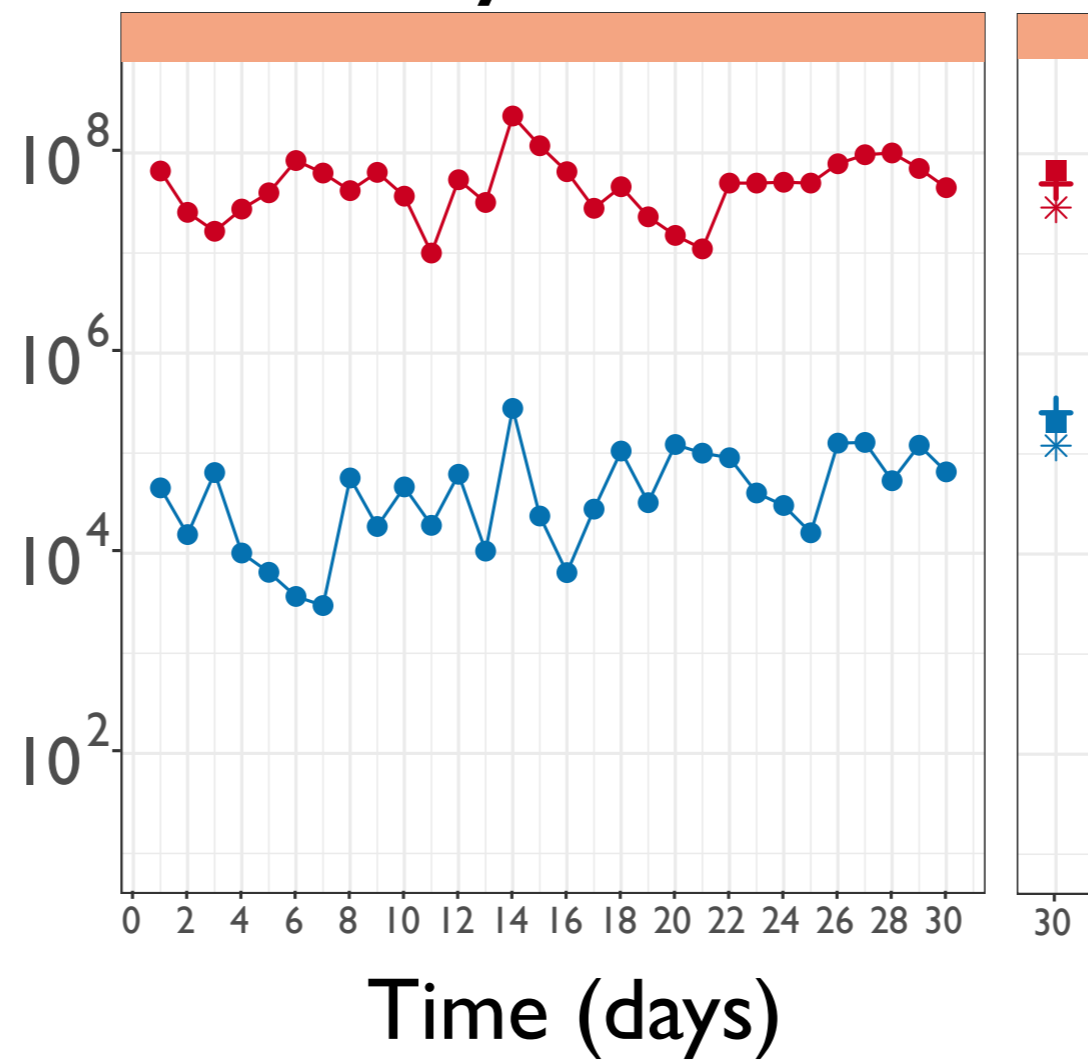**C****Daily fluctuations**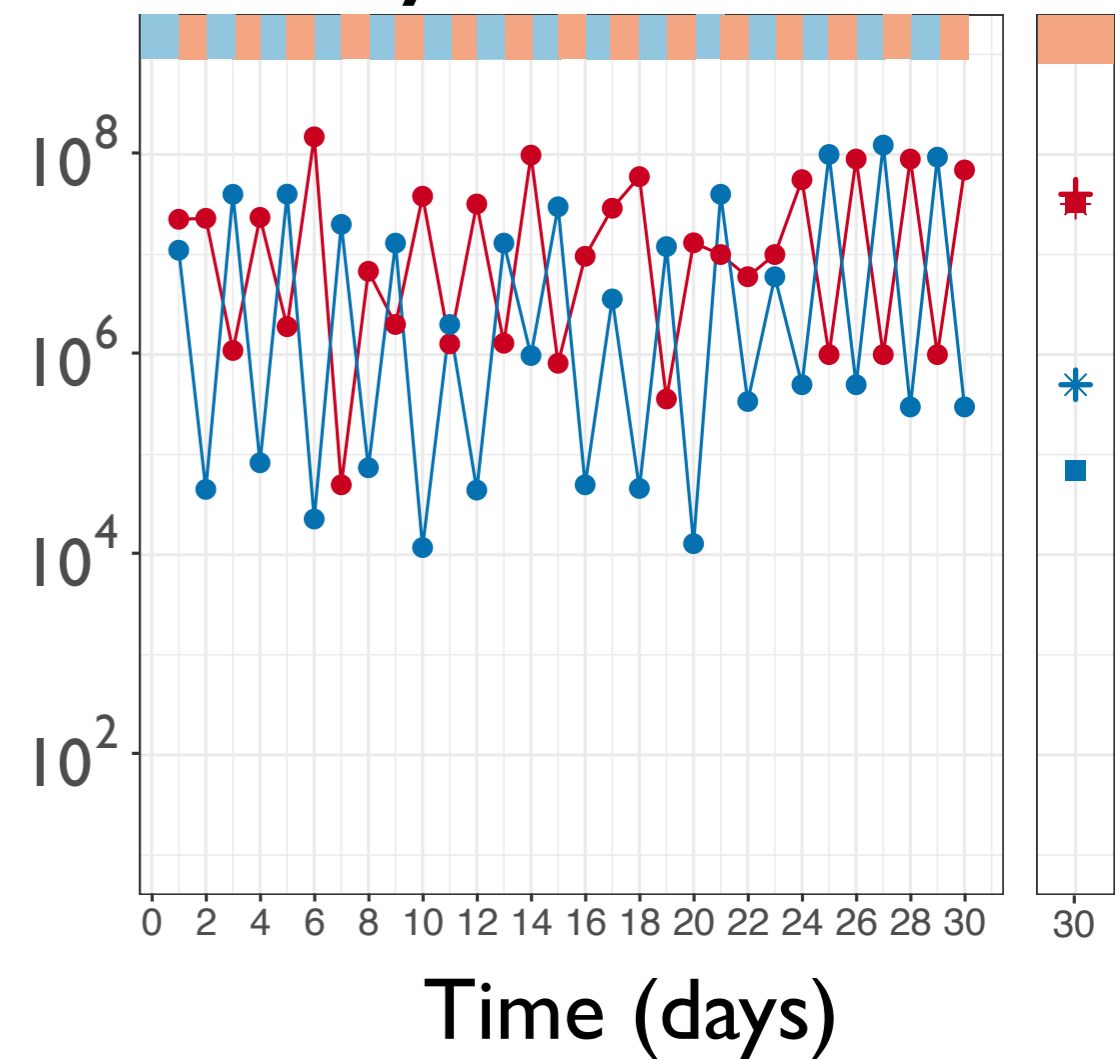

- + Consortium 1
- Consortium 2
- \* Consortium 3
- Consortium 4

**Species**

- *A. johnsonii*
- *P. putida*
