# Supplementary material
Source: PubMed Central journal article supplement (PMC8027891)

# Figure S1

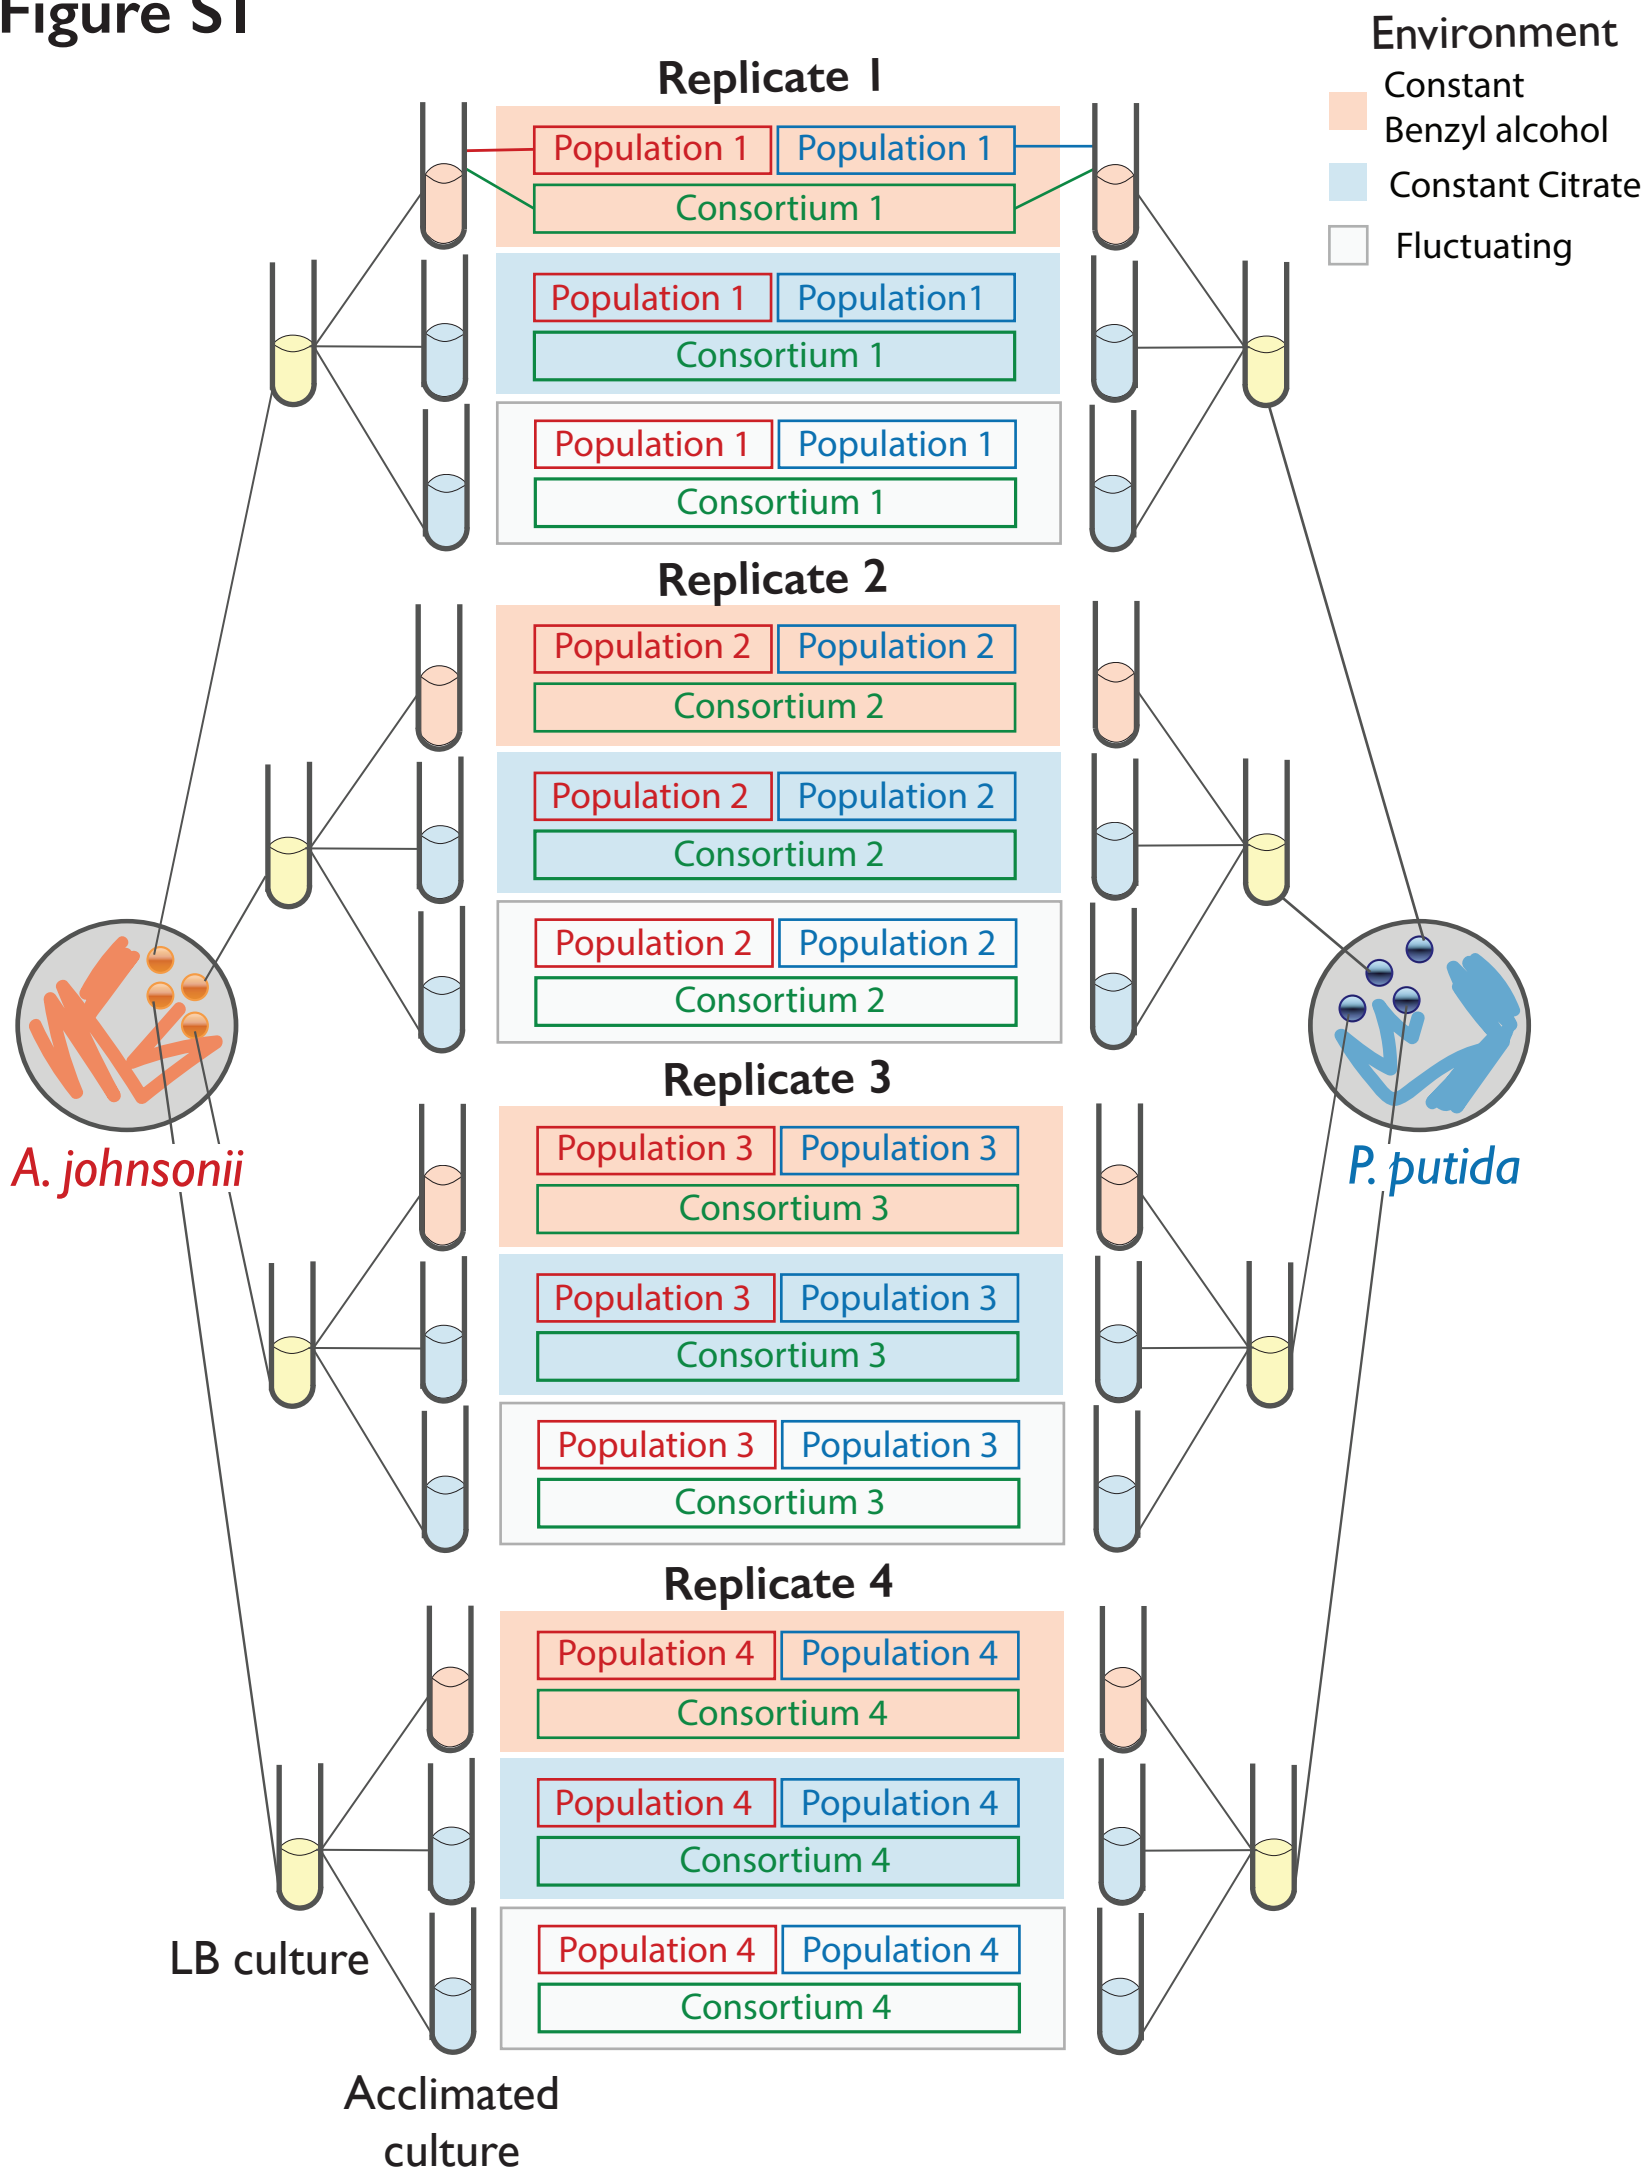

Supplement: 41396_2020_787_MOESM2_ESM.pdf [file 41396_2020_787_MOESM2_ESM.pdf]

# Figure S2

## Constant Benzyl Alcohol

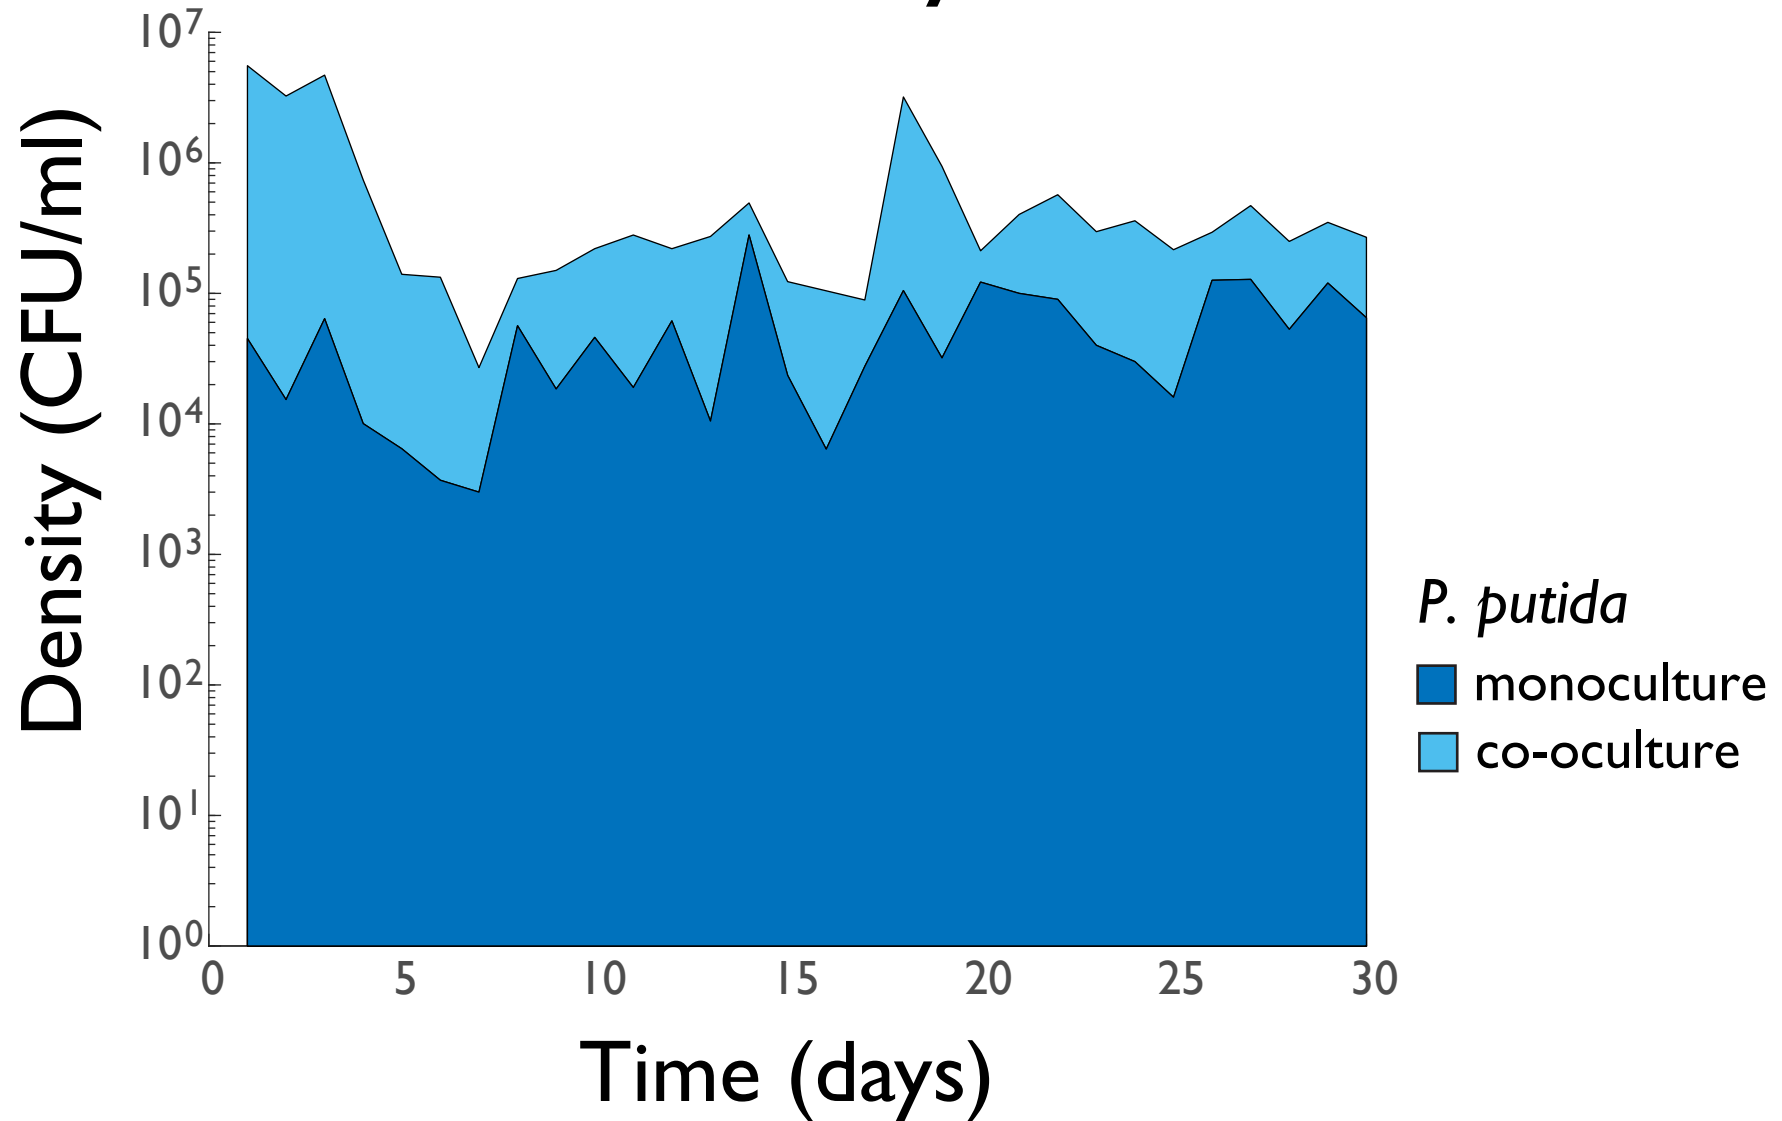

Supplement: 41396_2020_787_MOESM3_ESM.pdf [file 41396_2020_787_MOESM3_ESM.pdf]

# Figure S4

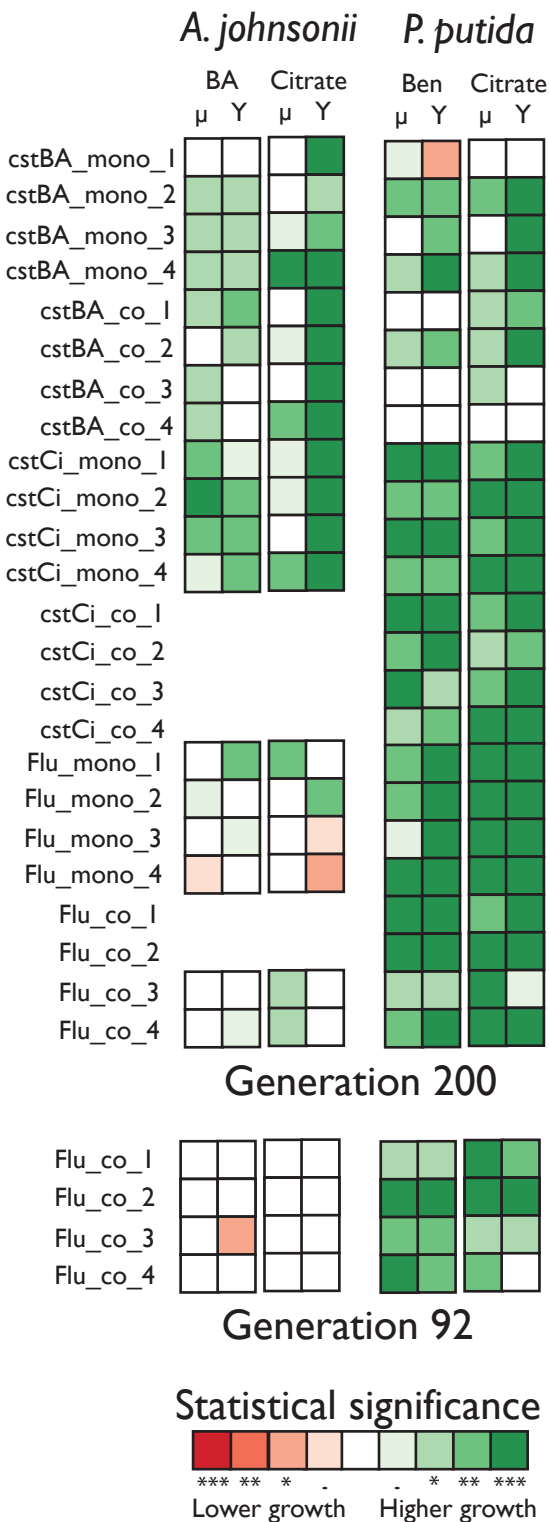

Supplement: 41396_2020_787_MOESM5_ESM.pdf [file 41396_2020_787_MOESM5_ESM.pdf]

# Figure S5

## Aj ancestor vs Pp ancestor

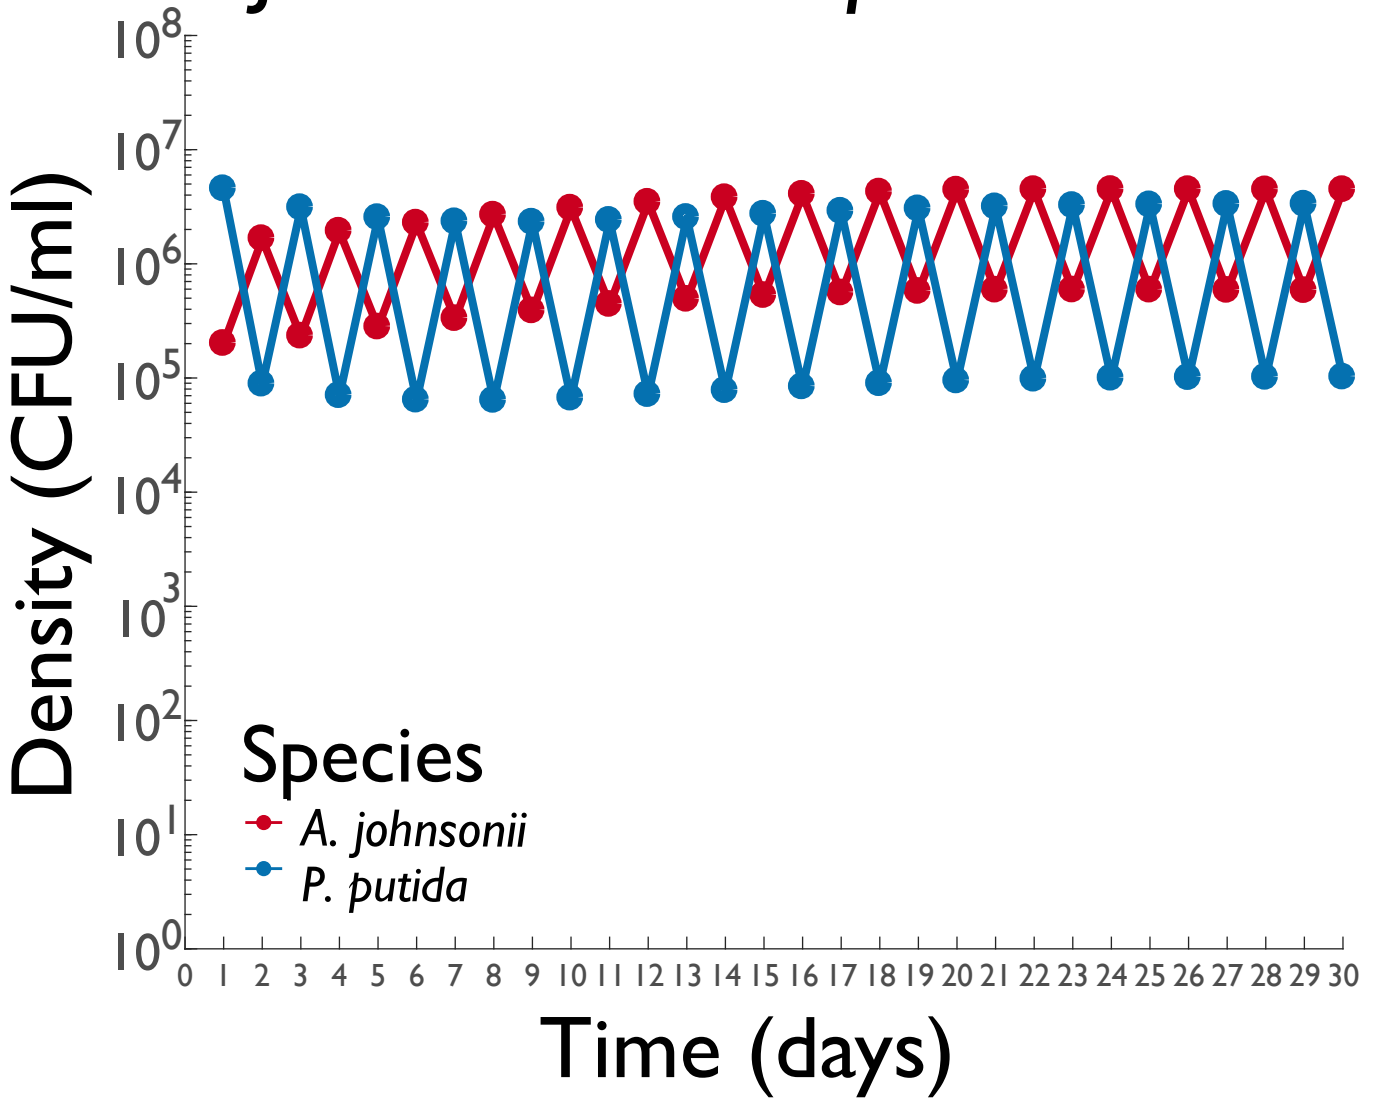

## Aj ancestor vs Pp evolved gen.92

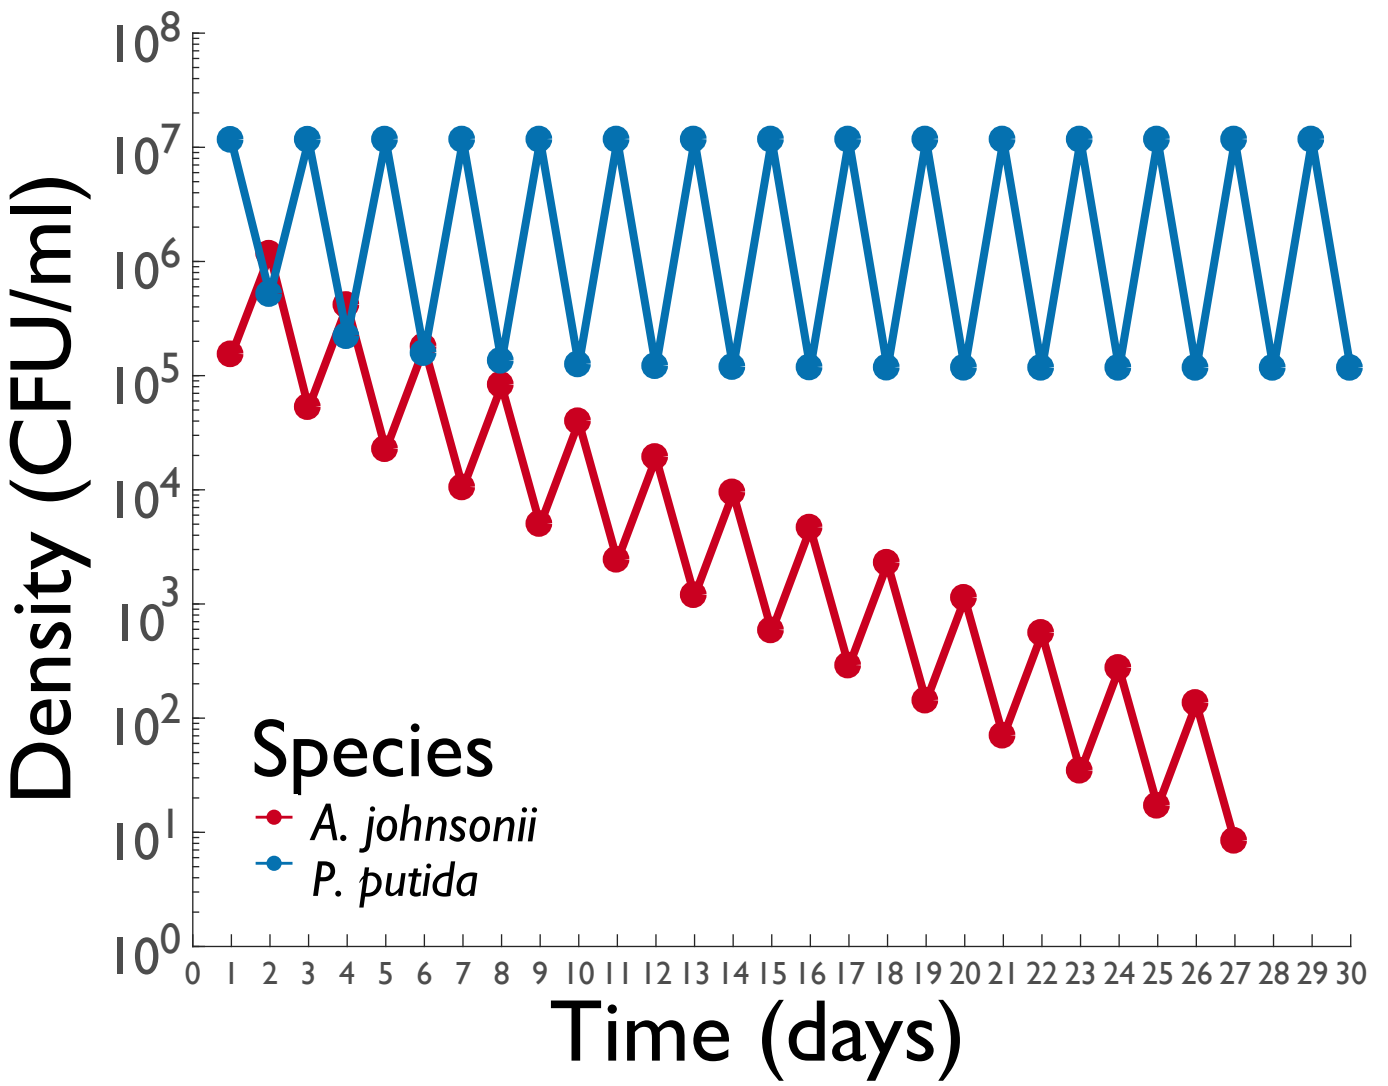

## Aj ancestor vs Pp evolved gen.200

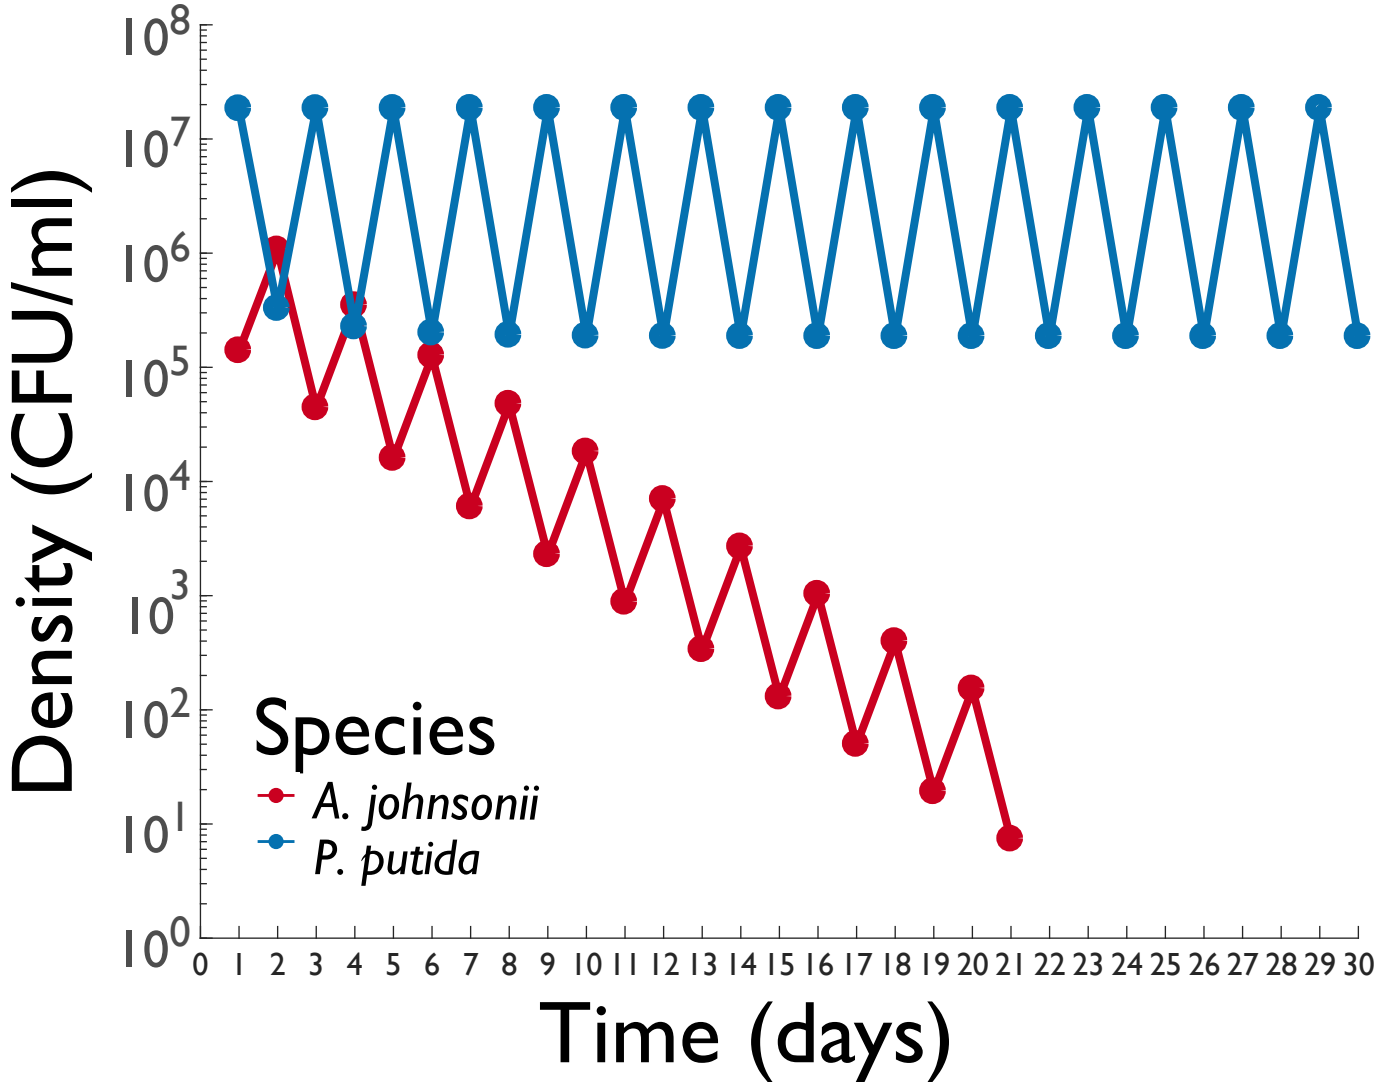

Supplement: 41396_2020_787_MOESM6_ESM.pdf [file 41396_2020_787_MOESM6_ESM.pdf]
